# Supplementary material
Source: PubMed Central journal article supplement (PMC6143050)

## Supplementary Online Content

Aguiar PN Jr, Haaland B, Park W, Tan PS, del Giglio A, Lopes GD Jr. Cost-effectiveness of osimertinib in the first-line treatment of patients with *EGFR*-mutated advanced non–small cell lung cancer. *JAMA Oncol*. Published online May 31, 2018. doi:10.1001/jamaoncol.2018.1395

**eTable 1.** Deterministic sensitivity analysis parameters

**eTable 2.** Summary of base-case analysis

**eFigure 1A.** Decision-analytic model used in this study

**eFigure 1B.** Fitted Kaplan-Meier models with Weibull tails for PFS and OS

**eFigure 2.** Tornado diagram of osimertinib cost-effectiveness in the US

**eFigure 3.** Tornado diagram of osimertinib cost-effectiveness in Brazil

**eFigure 4A.** Probability of being cost-effective in the US

**eFigure 4B.** Probability of being cost-effective in Brazil

This supplementary material has been provided by the authors to give readers additional information about their work.



**Table 1: Deterministic sensitivity analysis parameters**

| Parameter                         | Mean deterministic                | 95% CI                         |                                   |
|-----------------------------------|-----------------------------------|--------------------------------|-----------------------------------|
|                                   |                                   | Lower value                    | Upper value                       |
| <b>General</b>                    |                                   |                                |                                   |
| Discount rate                     | 10%                               | NA                             | NA                                |
|                                   | 20%                               | NA                             | NA                                |
| Maximum cost to be cost-effective | \$12,500 (US)<br>\$3,000 (Brazil) | NA                             | NA                                |
| <b>Costs</b>                      |                                   |                                |                                   |
| Monitoring costs (per month)      | \$1,150 (US)<br>\$448 (Brazil)    | \$920 (US)<br>\$358 (Brazil)   | \$1,380 (US)<br>\$537 (Brazil)    |
| End-of-life costs (per case)      | \$8,632 (US)<br>\$1,034 (Brazil)  | \$6,906 (US)<br>\$827 (Brazil) | \$10,358 (US)<br>\$1,240 (Brazil) |
| <b>Outcomes</b>                   |                                   |                                |                                   |
| Progression-Free Survival Utility | 0.6393                            | 0.6193                         | 0.6593                            |
| Post-Progression Survival Utility | 0.4734                            | 0.4334                         | 0.5134                            |
| <b>Survival</b>                   |                                   |                                |                                   |
| HR on PFS                         | 0.46                              | 0.37                           | 0.57                              |
| HR on OS                          | 0.63                              | 0.45                           | 0.88                              |

HR: Hazard Ratio; PFS: Progression-Free Survival; OS: Overall Survival.

**Table 2: Summary of base-case analysis**

| Parameters                   | United States |           |           |           | Brazil      |           |           |           |
|------------------------------|---------------|-----------|-----------|-----------|-------------|-----------|-----------|-----------|
|                              | Osimertinib   | Erlotinib | Gefitinib | Afatinib  | Osimertinib | Erlotinib | Gefitinib | Afatinib  |
| N of cycles                  | 18            | 10        | 10        | 10        | 18          | 10        | 10        | 10        |
| Drug Cost                    | \$306,520     | \$93,904  | \$91,174  | \$97,857  | \$158,219   | \$21,276  | \$10,299  | \$13,491  |
| Adverse Events Costs         | \$7,771       | \$7,854   | \$7,854   | \$7,854   | \$1,942     | \$1,964   | \$1,964   | \$1,964   |
| Post Progression Drugs Costs | \$32,273      | \$115,109 | \$115,109 | \$115,109 | \$13,332    | \$54,470  | \$54,470  | \$54,470  |
| End-of-life Costs            | \$1,726       | \$2,590   | \$2,590   | \$2,590   | \$207       | \$310     | \$310     | \$310     |
| Monitoring Costs             | \$18,400      | \$12,650  | \$12,650  | \$12,650  | \$7,180     | \$4,936   | \$4,936   | \$4,936   |
| Total Costs                  | \$333,334     | \$242,198 | \$239,194 | \$246,546 | \$158,402   | \$81,667  | \$69,592  | \$73,104  |
| Mean PFS (months)            | 19.10         | 11.70     | 11.70     | 11.70     | 19.10       | 11.70     | 11.70     | 11.70     |
| Mean PPS (months)            | 28.60         | 23.90     | 23.90     | 23.90     | 28.60       | 23.90     | 23.90     | 23.90     |
| Mean OS (months)             | 47.70         | 35.60     | 35.60     | 35.60     | 47.70       | 35.60     | 35.60     | 35.60     |
| Utility                      | 2.134         | 1.540     | 1.540     | 1.540     | 2.134       | 1.540     | 1.540     | 1.540     |
| AEs                          | -0.012        | -0.026    | -0.026    | -0.026    | -0.012      | -0.026    | -0.026    | -0.026    |
| QALY                         | 2.122         | 1.514     | 1.514     | 1.514     | 2.122       | 1.514     | 1.514     | 1.514     |
| Osimertinib QALY gain        | -             | 0.594     | 0.594     | 0.594     | -           | 0.594     | 0.594     | 0.594     |
| Osimertinib ICER per QALY    | -             | \$226,527 | \$231,123 | \$219,874 | -           | \$162,329 | \$180,804 | \$175,432 |
| LYS                          | 3.98          | 2.97      | 2.97      | 2.97      | 3.98        | 2.97      | 2.97      | 2.97      |
| Osimertinib LYS gain         | -             | 1.01      | 1.01      | 1.01      | -           | 1.01      | 1.01      | 1.01      |
| Osimertinib ICER per LYS     | -             | \$133,472 | \$136,180 | \$129,552 | -           | \$95,646  | \$106,532 | \$103,366 |

N: number; PFS: Progression-Free Survival; OS: Overall Survival; QALY: Quality-adjusted Life Years; ICER: Incremental Cost-effectiveness Ratio; LYS: Life Years Saved.

**eFigure 1A: Decision-analytic model used in this study**

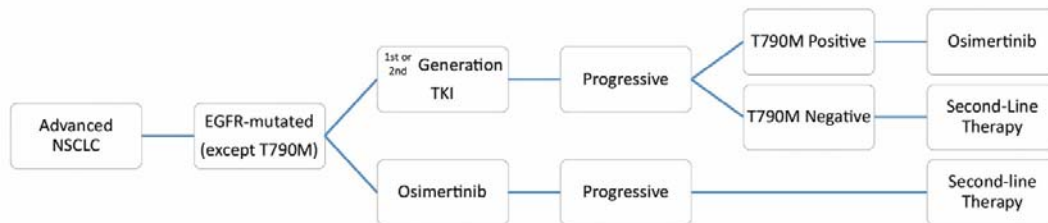

NSCLC (Non-small cell lung cancer), EGFR (Epidermal growth factor receptor), TKI (Tyrosine kinase inhibitor).

eFigure 1B: Fitted Kaplan-Meier models with Weibull tails for PFS and OS

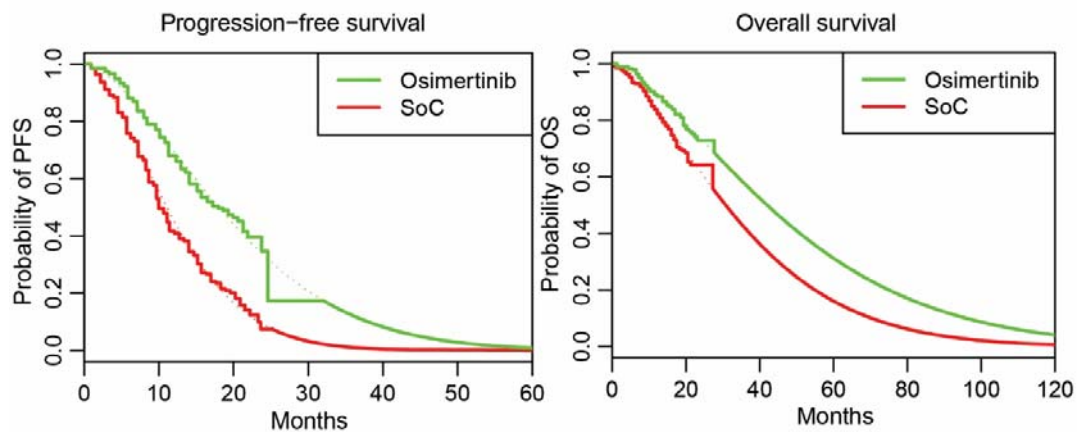

PFS: Progression-free survival; OS: Overall survival; SoC: Standard of care (first or second-generation EGFR-TKI)

**eFigure 2: Tornado diagram of osimertinib cost-effectiveness in the US**

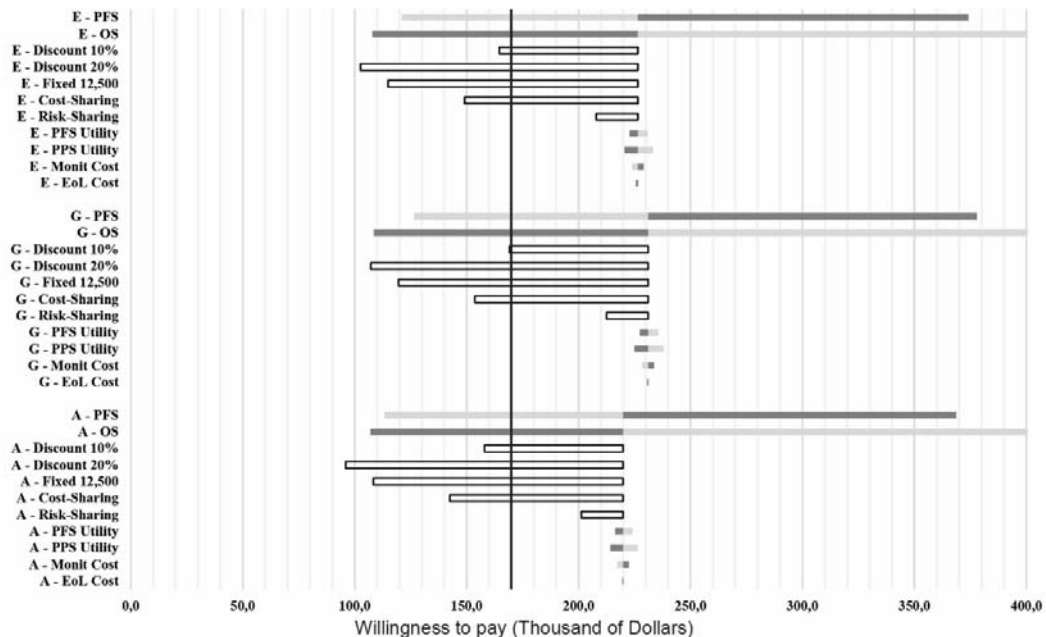

E (Erlotinib), PFS (Progression-Free Survival), OS (Overall Survival), PPS (Post-Progression Survival), Monit (Monitoring), EoL (end-of life), G (Gefitinib), A (Afatinib)

**eFigure 3: Tornado diagram of osimertinib cost-effectiveness in Brazil**

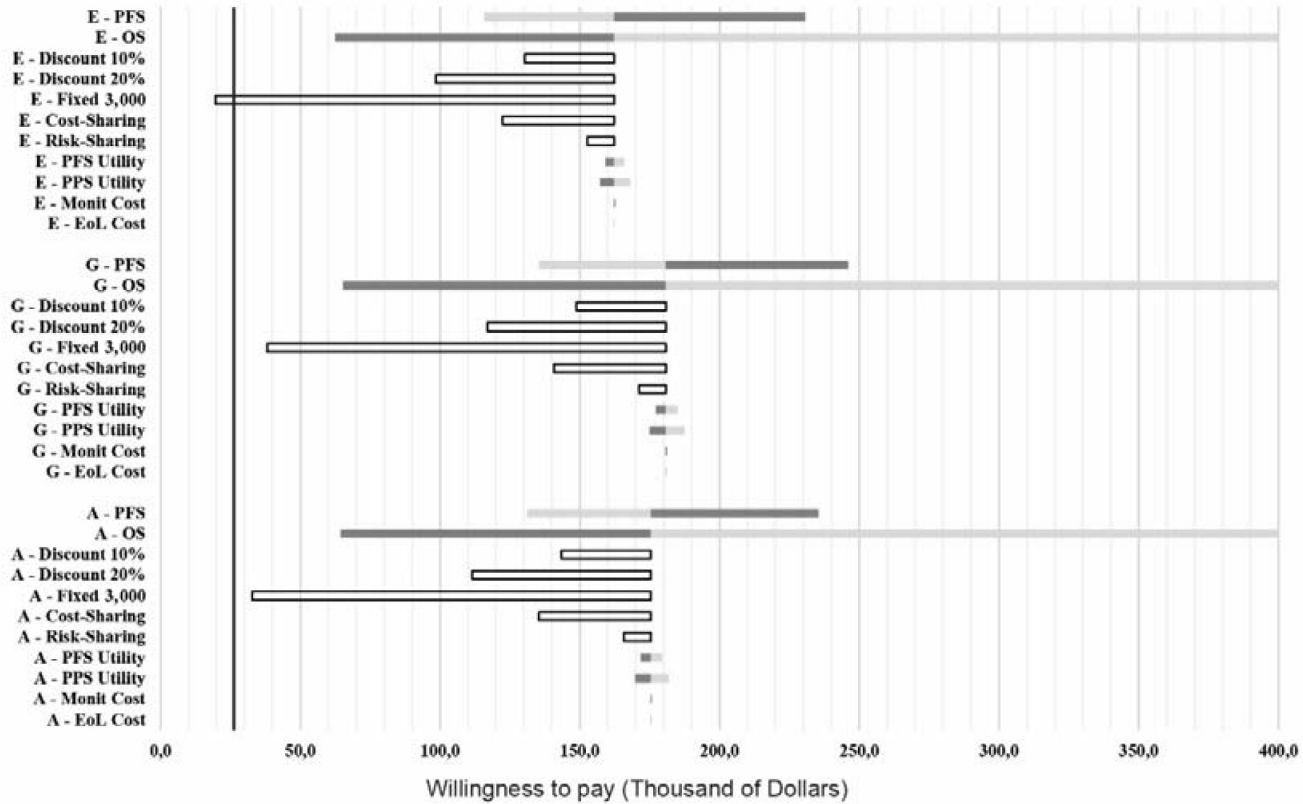

E (Erlotinib), PFS (Progression-Free Survival), OS (Overall Survival), PPS (Post-Progression Survival), Monit (Monitoring), EoL (end-of life), G (Gefitinib), A (Afatinib)



eFigure 4A - Probability of being cost-effective in the US

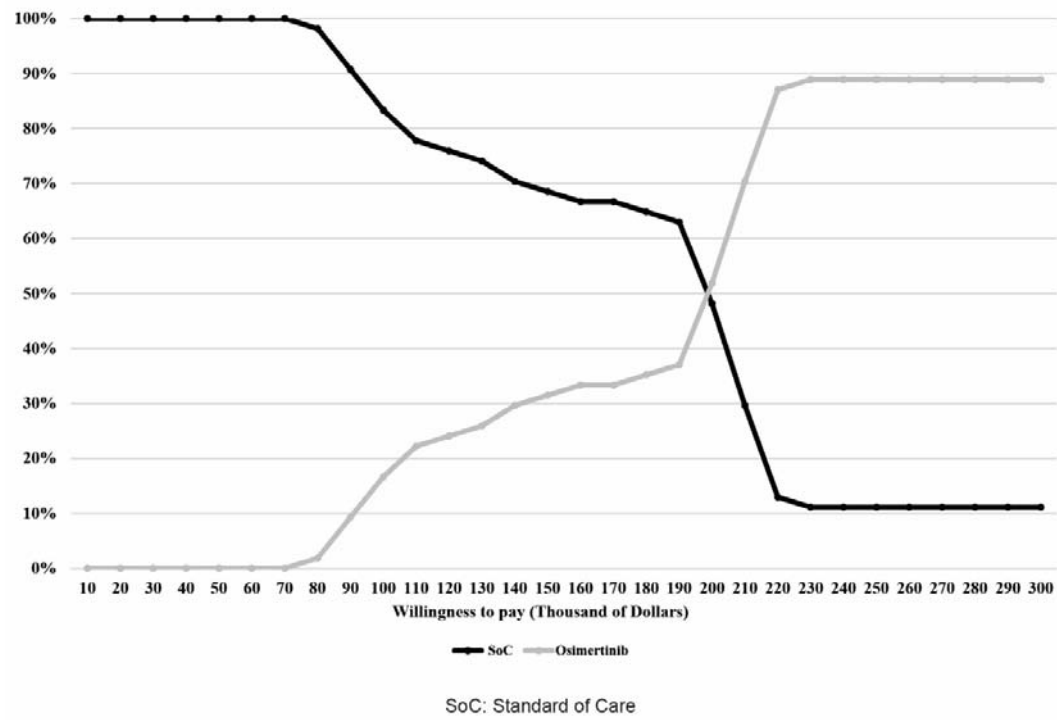

eFigure 4B - Probability of being cost-effective in Brazil

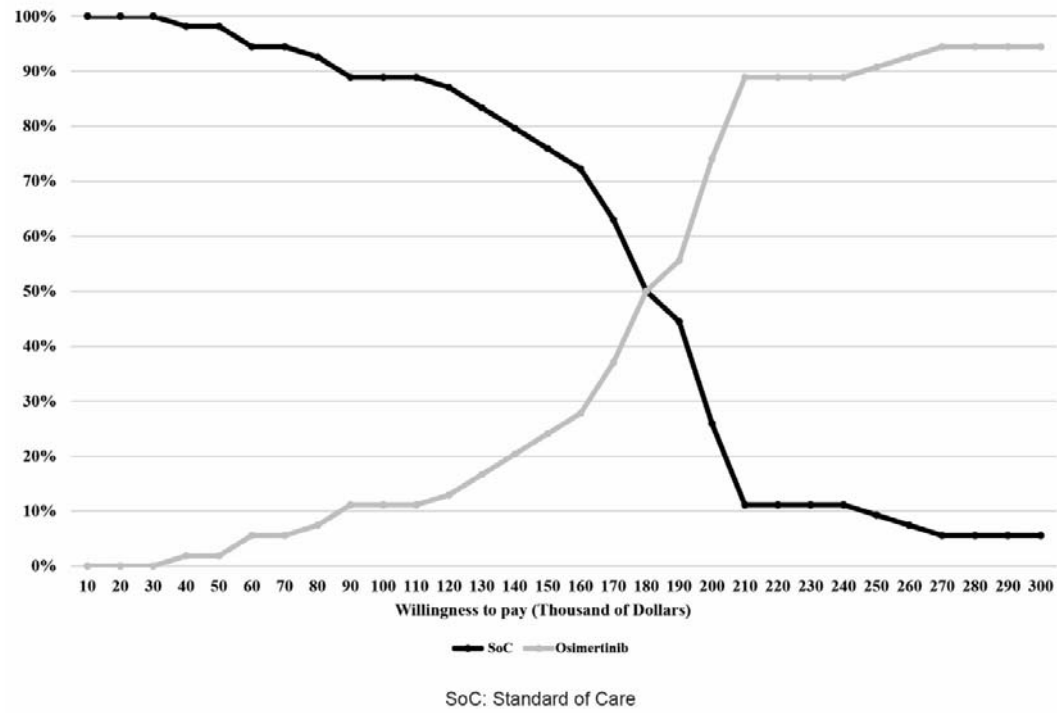

Supplement: jamaoncol-4-1080-s001.pdf [file jamaoncol-4-1080-s001.pdf]
